# Supplementary material
Source: PubMed Central journal article supplement (PMC5014637)
Supplement: NIHMS783279-supplement-01.pdf [file NIHMS783279-supplement-01.pdf]

Table E1. Descriptive and demographic data for participants ages 10-17 in L.A.FANS-2, a neighborhood and household survey in Los Angeles, CA, 2006-8 (n=551).

| Spirometry                               | mean (sd)       |
|------------------------------------------|-----------------|
| FVC (mL) mean (sd)                       | 3353.1 (961.2)  |
| FEV <sub>1</sub> (mL) mean (sd)          | 2814.0 (823.6)  |
| FEF <sub>25-75</sub> (mL/s) mean (sd)    | 3114.2 (1153.2) |
| Psychosocial stressors                   | n ( %)          |
| Neighborhood feels safe                  | 349 (63.4)      |
| <i>missing</i>                           | 2 (0.4)         |
| School feels safe                        | 423 (76.8)      |
| <i>missing</i>                           | 5 (0.9)         |
| Family does not fight                    | 490 (88.9)      |
| <i>missing</i>                           | 2 (0.4)         |
| Dad lives in the house                   | 367 (66.6)      |
| Child covariates                         |                 |
| Age mean (sd)                            | 13.4 (2.3)      |
| Height (cm) mean (sd)                    | 158.9 (11.7)    |
| Weight (kg) mean (sd)                    | 61.4 (19.3)     |
| Race                                     |                 |
| Hispanic                                 | 369 (66.8)      |
| non-Hispanic white                       | 80 (14.5)       |
| Black                                    | 27 (4.9)        |
| Asian/Pacific Islander                   | 28 (5.1)        |
| Other (multiple races)                   | 47 (8.5)        |
| Child's nativity                         |                 |
| US-born                                  | 505 (91.7)      |
| Child smokes                             | 10 (1.8)        |
| <i>missing</i>                           | 4 (0.7)         |
| Asthma diagnosis with wheeze (12 months) | 37 (6.7)        |
| Family/household covariates              |                 |
| Maternal Education                       |                 |
| ≤ 8th grade                              | 133 (24.1)      |
| 9-12th grade                             | 191 (34.7)      |
| Vocational school                        | 32 (5.8)        |
| AA/some college                          | 116 (21.1)      |
| College+                                 | 76 (13.8)       |
| <i>missing</i>                           | 3 (0.5)         |
| Federal poverty level                    |                 |
| <100%                                    | 158 (28.7)      |
| 101-200%                                 | 161 (29.2)      |
| 201-300%                                 | 93 (16.9)       |

|                         |            |
|-------------------------|------------|
| 301%+                   | 139 (25.2) |
| Current smoker in house | 119 (21.6) |

---

1

2

3

Table E2. Pollutant median values and ranges for L.A.FANS adolescent respondents with spirometry measures (n=551)

| Pollutant                           | Median, Range     | IQR  |
|-------------------------------------|-------------------|------|
| NO <sub>2</sub> (ppb)               | 23.7 (6.2, 34.6)  | 5.3  |
| NO <sub>x</sub> (ppb)               | 47.7 (11.8, 90.1) | 16.5 |
| NO (ppb)                            | 23.5 (3.5, 56.5)  | 10.4 |
| PM <sub>2.5</sub> µm/m <sup>3</sup> | 21.7 (8.5, 23.6)  | 1.8  |

4

1 METHODS

2 Sample

3 *Los Angeles Family and Neighborhood Survey 2*

4 Participants were drawn from the Los Angeles Family and Neighborhood Survey (L.A.FANS)  
5 wave 2. The first wave (L.A.FANS-1) sampled 3,090 households from 65 neighborhoods in  
6 Los Angeles County in 2000-2001, interviewing 3,140 children ages 0-17 with oversampling  
7 of very poor and poor households. The cohort included 55% Hispanic, 26% White, 10%  
8 Black, and 7% Asian participants. In 2006-2008, L.A.FANS-2 re-interviewed L.A.FANS-1  
9 participants and added additional households from within the same neighborhoods. 1,091  
10 children were re-interviewed (64% response rate) and 296 new children were added to the  
11 sample, for a total of 1,387 children. This second wave also added spirometry data  
12 collection to its protocol. To minimize lung function measurement error issues, likely to be  
13 larger in younger children, and to allow us to assess adolescents' self-reported psychosocial  
14 stress, we restricted our analyses to individuals ages 10-17 years (here referred to as  
15 "adolescents" following the World Health Organization nomenclature<sup>1</sup>) with a reproducible  
16 spirometry curve (n=551).

17 Outcome, exposure and covariate definitions

18 *Spirometry*

19 Of the 1,387 children in L.A.FANS-2, 1,070 children aged 5-17 years participated in  
20 spirometry assessments. Evaluation and acceptance criteria for spirometry curves have  
21 been previously detailed.<sup>2</sup> Briefly, an expert with specific experience evaluating spirometry  
22 data from children as part of the UC Berkeley Fresno Asthmatic Children's Environment  
23 Study reviewed all curves. To determine acceptability, all grading of spirometry curves was  
24 done based on the following criteria (some of which overlap with the 1994 American  
25 Thoracic Society criteria<sup>3</sup>): (1) The Back Extrapolated Volume must be  $\leq 5\%$  or 150mL,  
26 whichever is greater; (2) Time to Peak Flow must be  $\leq 120$  milliseconds; (3) No abrupt end  
27 to test; (4) Forced expiratory time must be  $\geq 2$  seconds; (5) Time/Volume curve must begin  
28 at origin (to ensure proper start of test); (6) Curve must show that subject exhaled using  
29 only one continuous blast of air; and (7) Curve must show no leaks or negative flow  
30 throughout test (i.e. no inhalation). Only curves judged acceptable by the reviewer were  
31 included; curves judged acceptable by the EasyOne™ portable spirometer without reviewer

32 approval were not included in analyses. Of the 775 children with at least one acceptable  
33 curve for analysis, 551 children were between 10-17 years of age.

#### 34 *Air pollution estimates*

35 Our air pollution measures have been described previously in detail.<sup>2</sup> We monitored  
36 pollution using 186 passive Ogawa sampler badges for NO<sub>x</sub> and NO<sub>2</sub> in two seasons of  
37 2006/7 in neighborhoods in which LAFANS participants resided. This neighborhood level  
38 NO<sub>x</sub> and NO<sub>2</sub> measurement data were then used to develop a land use based regression  
39 (LUR) model for the Los Angeles Basin, building LUR prediction surfaces<sup>4,5</sup> for NO, NO<sub>2</sub> and  
40 NO<sub>x</sub>. PM<sub>2.5</sub> estimates were generated by kriging available government monitoring data from  
41 23 state and local district monitoring stations in the LA basin for the year 2000. Participants  
42 in L.A.FANS-2 provided residential history information for the six years between survey  
43 waves, allowing us to create annual average measures weighted for time spent at each  
44 location for the past 5+ years. In a previous analysis we showed that exposure measures for  
45 the 5 year, 2 year, 12 month, and current home only models were very similar.<sup>2</sup> Thus for the  
46 current analyses, we extracted from our models annual average measures of each pollutant,  
47 weighted for time spent at both residences and schools in the past 12 months.

#### 48 *Psychosocial stressors*

49 Adolescent-reported: Adolescents self-reported whether “people in my family fight a lot”  
50 (true vs. sometimes true or not true), whether they “feel safe in this neighbourhood” (yes vs.  
51 sometimes or no) and whether they “feel safe at this school” (yes vs. sometimes or no).

52 Caregiver/family: The individual who identified as head of household reported whether the  
53 father of each child lived in the house (yes/no).

#### 54 *Adolescent/household socio-demographic covariates*

55 The following covariates were collected regarding the adolescents: gender, age, height and  
56 weight, race/ethnicity, nativity, self-reported smoking, asthma history, and wheeze within  
57 the past 12 months. Maternal education, household income (which was used to categorize  
58 federal poverty level (FPL)), and any reported smoking in the house were also collected in  
59 the survey.

60

61 Statistical analyses

62 Potential confounders were selected and included in all models based upon the previous  
63 literature and by assessing changes in estimates for air pollutants greater than 10%. These  
64 covariates included adolescent's age, FPL, smokers in the household, adolescent's  
65 race/ethnicity, height, height-squared, weight, weight-squared, sex, and sex\*age. Few  
66 adolescents (n=10) reported smoking. Inclusion of this variable in the models did not  
67 change estimates for the air pollutants and thus was not retained in final models. Analyses  
68 were conducted in SAS 9.3 (Cary, NC).

69

## 70 RESULTS

71

72 Neither self-reported neighborhood safety nor school safety were associated with  
73 spirometry measures, although all co-adjusted air pollutant estimates were independently  
74 associated with the spirometry measures. We did not observe statistical interaction of these  
75 psychosocial stressors with any of the air pollutants (data not shown).

76

77 In sensitivity analyses, removing those with an asthma diagnosis who experienced wheeze  
78 in the past 12 months (n=37) resulted in slight attenuation but did not change air pollutant  
79 estimates or interactions by >10% (data not shown).

80

81

## 82 DISCUSSION

83

84 Using information on family, neighborhood and school-related psychosocial stressors  
85 collected in L.A.FANS, we were able to assess whether these measures modified the  
86 associations between select air pollutants and spirometry outcomes in adolescents ages 10-  
87 17 years. We found that paternal absence, while not independently associated with lung  
88 function measures, modified the association of NO<sub>2</sub> and both FEV<sub>1</sub> (p=0.02) and FVC  
89 (p=0.04). While associations were modest, the deficits of FEV<sub>1</sub> associated with NO<sub>2</sub> were  
90 ~2% of the median FEV<sub>1</sub> values in the sample (2814mL), while deficits were 5% accounting  
91 for the interaction with paternal absence. Although not statistically significant, NO, NO<sub>x</sub> and  
92 PM<sub>2.5</sub> followed the same pattern, with stronger negative associations observed between the  
93 air pollutants and spirometry measures in adolescents from households without a father  
94 than in households with a father present. Similar trends were observed when we compared

95 adolescents' self-reported family fighting with those who reported no family fighting,  
96 although interaction terms did not reach statistical significance. Neither self-reported  
97 school safety nor neighborhood safety modified associations of air pollutant and spirometry  
98 measures of lung function.

99

100 We were compelled by the findings of synergism between air pollutants and stress in the  
101 Children's Health Study,<sup>6</sup> but relying on early static measures of parental stress only may  
102 not appropriately represent and thus potentially misclassify the stress an adolescent is  
103 experiencing. The stress burden in a household likely changes with time and circumstance,  
104 and while parental measures of stress may influence the perceived stress of a five year-old  
105 child, to our knowledge the role of timing of stress during lung development in relation to  
106 decrements in lung function has not been established. As children age into adolescence,  
107 their own coping skills, peer networks and autonomy increase. This highlights the  
108 importance of considering an adolescent's stress burden on their pulmonary function from  
109 their point of view in addition to the parents'. Without having validated stress measures  
110 available in L.A.FANS, we employed measures that had face validity or previously reported  
111 associations with cortisol or lung function, as follows:

112

113 We examined school and neighborhood safety based on both their face validity (e.g.- do you  
114 feel safe in your school/neighborhood: yes, no, sometimes) as well as based on previous  
115 studies that found that a child's perceived neighborhood safety<sup>7</sup> and school safety<sup>8</sup> are  
116 associated with psychological distress. However, since few participants reported not feeling  
117 safe at all in their school or neighborhood, we combined the categories 'not at all' and  
118 'sometimes' not feeling safe (reference: always feeling safe), which may have resulted in a  
119 measures representing much lower stress than has previously been assessed.

120

121 We selected self-reported 'family conflict' based upon findings associating interparental  
122 conflict with increased cortisol levels in children,<sup>9,10</sup> as well as findings that 6-7 year-old  
123 girls had reduced FEV<sub>1</sub> and FVC when mothers reported high levels of interparental  
124 conflict.<sup>11</sup> Previous research on interparental conflict found that the child's involvement in  
125 the family conflict (e.g. comforting the parent) as well as externalizing behaviors mediated  
126 cortisol response. However, we acknowledge that in this previous research the children

127 were much younger (ages 5-7),<sup>9,10</sup> potentially limiting the relevance of the findings for our  
128 adolescent sample.

129

130 A large body of evidence suggests that paternal absence has many negative consequences  
131 for children, including behavioral problems and psychological distress (review paper<sup>12</sup>). A  
132 previous study found father-absent male adolescents had higher cortisol levels compared  
133 with father-present adolescents, but there was no difference in cortisol levels between  
134 father-present/absent adolescent females.<sup>13</sup> In L.A.FANS, we were not able to assess if a  
135 father-surrogate (stepfather, grandfather) was present in the house, which would be helpful  
136 to assess in future work in order to understand what “father’s absence” is measuring.

137

138

139

140 1. World Health Organization adolescent health [Internet]. [cited 2015 May 8]; Available  
141 from: [http://www.who.int/topics/adolescent\\_health/en/](http://www.who.int/topics/adolescent_health/en/)  
142

143 2. Ritz BR, Ghosh JKC, Tuner MW, Qiu J, Jerrett M, Su J, et al. Traffic-Related Air Pollution  
144 and Asthma in Economically Disadvantaged and High Traffic Density Neighborhoods  
145 in Los Angeles County, California [Internet]. 2009;1–113. Available from:  
146 [http://www.arb.ca.gov/research/single-project.php?row\\_id=64715](http://www.arb.ca.gov/research/single-project.php?row_id=64715)  
147

148 3. Crapo R, Hankinson J, Irvin C, MacIntyre N, Voter K, Wise R. Standardization of  
149 Spirometry. *Am J Respir Crit Care Med* 1995;152:1107–36.  
150

151 4. Su JG, Jerrett M, Beckerman B. A distance-decay variable selection strategy for land  
152 use regression modeling of ambient air pollution exposures. *Sci Total Environ*  
153 2009;407:3890–8.  
154

155 5. Su JG, Jerrett M, Beckerman B, Wilhelm M, Ghosh JK, Ritz B. Predicting traffic-related  
156 air pollution in Los Angeles using a distance decay regression selection strategy.  
157 *Environ Res* 2009;109:657–70.  
158

159 6. Islam T, Urman R, Gauderman WJ, Milam J, Lurmann F, Shankardass K, et al. Parental  
160 stress increases the detrimental effect of traffic exposure on children’s lung function.  
161 *Am J Respir Crit Care Med* 2011;184:822–7.  
162

163 7. Booth, J., Ayers, S. L., & Marsiglia FF. Perceived neighborhood safety and  
164 psychological distress: Exploring protective factors. *J Sociol Soc Welf* 2012;39:137–  
165 56.

166

167 8. Flannery DJ, Wester KL, Singer MI. Impact of Exposure To Violence in School on Child  
168 and Adolescent Mental Health and Behavior. *J Community Psychol* 2004;32:559-73.  
169

170 9. Davies PT, Sturge-apple ML, Cicchetti D, Cummings EM. The Role of Child  
171 Adrenocortical Functioning in Pathways Between Interparental Conflict and Child  
172 Maladjustment. *Dev Psychol* 2007;43:918-30.  
173

174 10. Davies PT, Sturge-Apple ML, Cicchetti D, Cummings EM. Adrenocortical  
175 Underpinnings of Children's Psychological Reactivity to Interparental Conflict  
176 Patrick. *Child Dev* 2008;79:1693-706.  
177

178 11. Suglia SF, Ryan L, Laden F, Wright RJ. Violence exposure, a chronic psychosocial  
179 stressor, and childhood lung function. *Psychosom Med* 2008;70:160-9.  
180

181 12. McLanahan S, Tach L, Schneider D. The Causal Effects of Father Absence. *Annu Rev*  
182 *Sociol* 2013;399:399-427.  
183

184 13. Flinn M V., Quinlan RJ, Decker S a., Turner MT, England BG. Male-female differences  
185 in effects of parental absence on glucocorticoid stress response. *Hum Nat*  
186 1996;7:125-62.  
187

188

189

190

191

192

193

194

195

196

197

198

199

200
